# Supplementary material
Source: PubMed Central journal article supplement (PMC2886820)
Supplement: 00002.2010_1.pdf [file 00002.2010_1.pdf]

SUPPLEMENTAL FIGURE 1

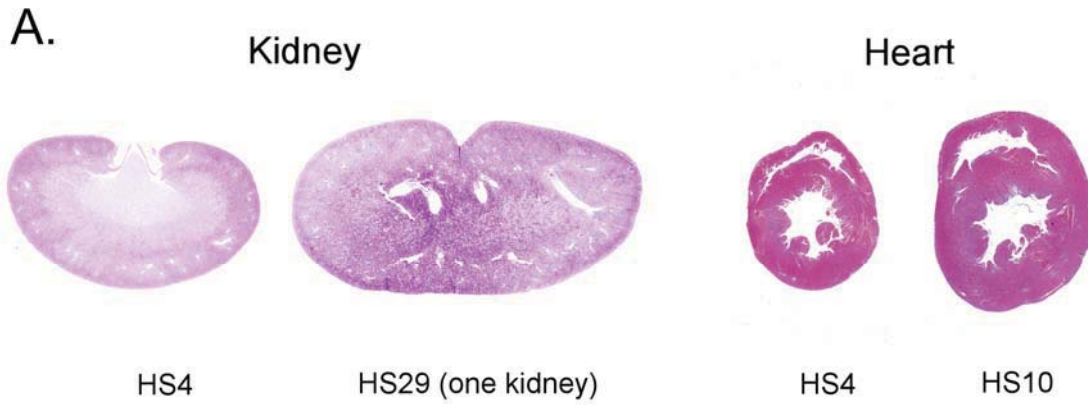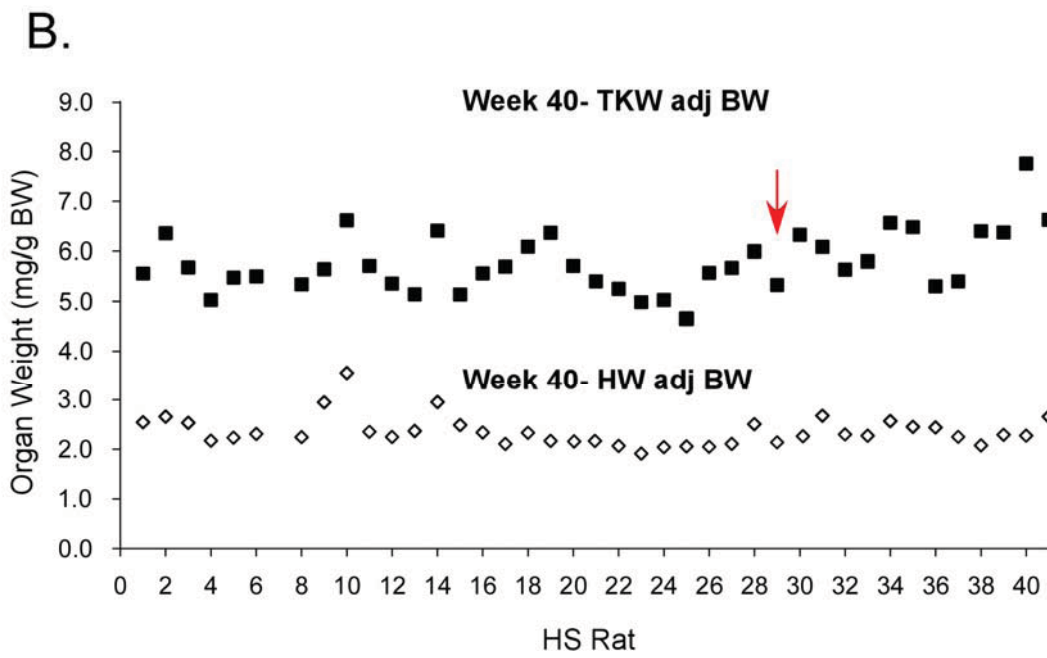

SUPPLEMENTAL FIGURE 2

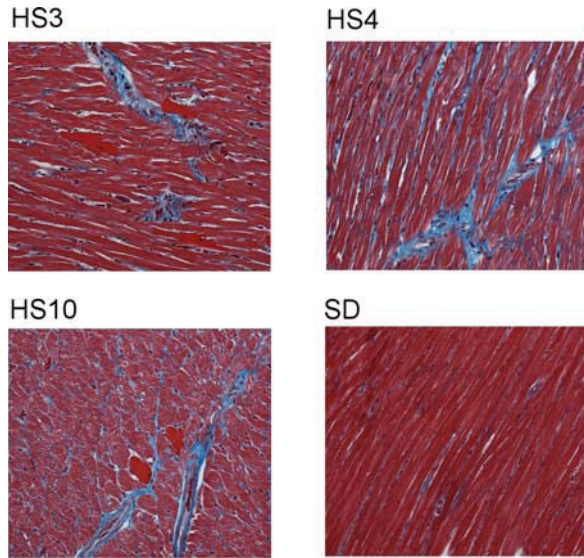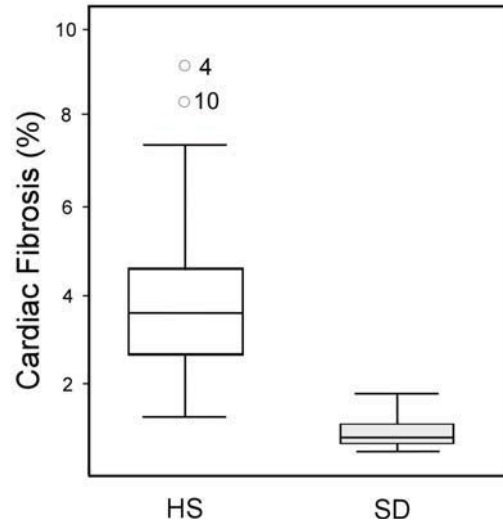

**Supplemental Figure 1:** Organ size and weight of individual HS rats at 40 weeks of age.

(A) Full section images of select kidney and heart from HS rats. The selected images were chosen from HS rats that exhibited similar body weights, but exhibited a large variation in kidney or heart size. HS29 was observed to have a single kidney (red arrow) and compared to HS4 (normal for animal of comparable size) was significantly larger.

(B) Scatter plot showing individual HS kidney weight and heart weights. Organ weights were normalized for differences in body weight (BW) as are presented as mg/g BW.

**Supplemental Figure 2:** Measurement of cardiac fibrosis in HS and SD rats. Select image are shown to illustrate significant variability in cardiac fibrosis observed in HS rats as opposed to little variation in SD rats. HS3 is an example of the median (line within the box plot). HS4 and HS10 (outliers denoted by open circle) are shown to illustrate the most severe cardiac fibrosis observed in the study. Open plots are HS and shaded plots are SD data.
